# Supplementary material for: A pH-responsive amphiphilic chitosan–pyranine core–shell nanoparticle for controlled drug delivery, imaging and intracellular pH measurement
Source: Royal Society of Chemistry journal article supplement (doi:10.1039/c4tb01080a), 2014-01-01
Supplement: c4tb01080a1.pdf [file c4tb01080a1.pdf]

Supporting information

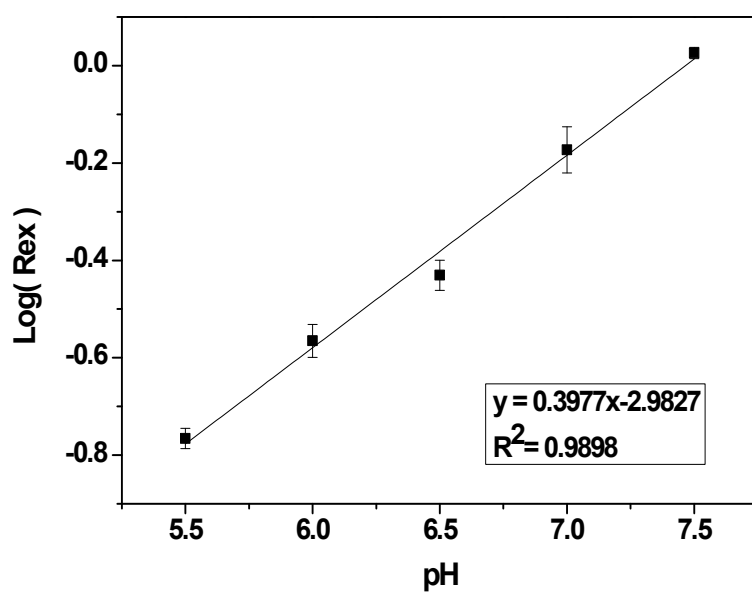

Figure S1. Calibration curve of Rex Value with intracellular pH, which obtained in different pH buffer.

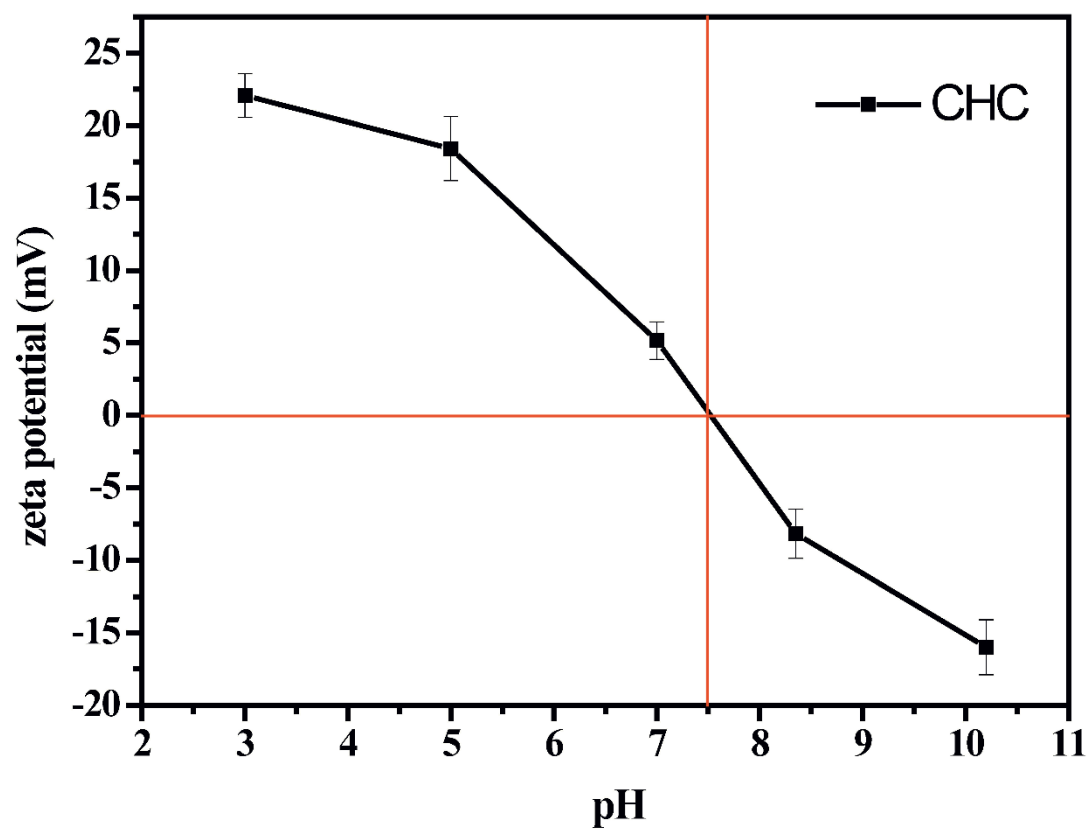

Figure S2. The zeta potential curve of CHC core nanoparticle, where an IEP is determined at ~pH 7.5.
